# Supplementary material for: Improved luminescence properties of a novel red dodec-fluoride phosphor Ba3Sc2F12:Mn4+ with extraordinary thermal stability for WLED application
Source: Royal Society of Chemistry journal article supplement (doi:10.1039/d0tc00652a), 2020-01-01
Supplement: d0tc00652a1.pdf [file d0tc00652a1.pdf]

## Electronic Supplementary Information

### Improved luminescent properties of a novel red dodec-fluoride phosphor

#### **Ba<sub>3</sub>Sc<sub>2</sub>F<sub>12</sub>:Mn<sup>4+</sup> with extraordinary thermal stability for WLEDs application**

Xinlong Dong,<sup>a</sup> Yuexiao Pan,<sup>a\*</sup> Yajun Jia,<sup>a</sup> Rongjing Liu,<sup>a</sup> Hongzhou Lian,<sup>b</sup> Jun Lin<sup>b\*</sup>

*<sup>a</sup>Key Laboratory of Carbon Materials of Zhejiang Province, College of Chemistry and Materials Engineering, Wenzhou University, Wenzhou 325035, P.R. China.*

*E-mail: yxpan@wzu.edu.cn; Fax&Tel: +86-577-88373017*

*<sup>b</sup>State Key Laboratory of Rare Earth Resource Utilization, Changchun Institute of Applied Chemistry, Chinese Academy of Sciences, Changchun 130022, P. R. China*

*E-mail: jlin@ciac.ac.cn; Fax: +86-431-85698041; Tel: +86-431-85262031*

**Table S1.** Lattice parameters of the red phosphor  $\text{Ba}_3\text{Sc}_2\text{F}_{12}:\text{Mn}^{4+}$  with various concentrations of  $\text{K}_2\text{MnF}_6$  (unit: pm, degree) (note: x is concentrations of  $\text{K}_2\text{MnF}_6$ )

| Sample | x      | a (Å)   | b (Å)  | c (Å)  | $\alpha$ | $\beta$ | $\gamma$ |
|--------|--------|---------|--------|--------|----------|---------|----------|
| 1      | x=0.01 | 10.1961 | 5.5536 | 5.5536 | 90°      | 90°     | 90°      |
| 2      | x=0.02 | 9.6576  | 5.4431 | 5.4431 | 90°      | 90°     | 90°      |
| 3      | x=0.04 | 9.6548  | 5.4371 | 5.4371 | 90°      | 90°     | 90°      |
| 4      | x=0.06 | 9.6299  | 5.4438 | 5.4438 | 90°      | 90°     | 90°      |
| 5      | x=0.08 | 9.5821  | 5.3806 | 5.3806 | 90°      | 90°     | 90°      |
| 6      | x=0.1  | 9.5811  | 5.1775 | 5.1775 | 90°      | 90°     | 90°      |

**Table S2.** Lattice parameters of the red phosphor  $\text{Ba}_3\text{Sc}_2\text{F}_{12}:\text{Mn}^{4+}$  with part of  $\text{Ba}^{2+}$  substituted ions with  $\text{Ca}^{2+}$  ions. (unit: pm, degree)

| Sample | $\text{Ca}^{2+}/\text{Ba}^{2+}$       | a (Å)  | b (Å)  | c (Å)  | $\alpha$ | $\beta$ | $\gamma$ |
|--------|---------------------------------------|--------|--------|--------|----------|---------|----------|
| 1      | no $\text{Ca}^{2+}$ doped             | 9.6654 | 5.5600 | 5.6000 | 90°      | 90°     | 90°      |
| 2      | $\text{Ca}^{2+}/\text{Ba}^{2+} = 1/9$ | 9.4725 | 5.5525 | 5.5525 | 90°      | 90°     | 90°      |
| 3      | $\text{Ca}^{2+}/\text{Ba}^{2+} = 2/8$ | 9.4622 | 5.5497 | 5.5497 | 90°      | 90°     | 90°      |
| 4      | $\text{Ca}^{2+}/\text{Ba}^{2+} = 3/7$ | 9.4283 | 5.4792 | 5.4792 | 90°      | 90°     | 90°      |

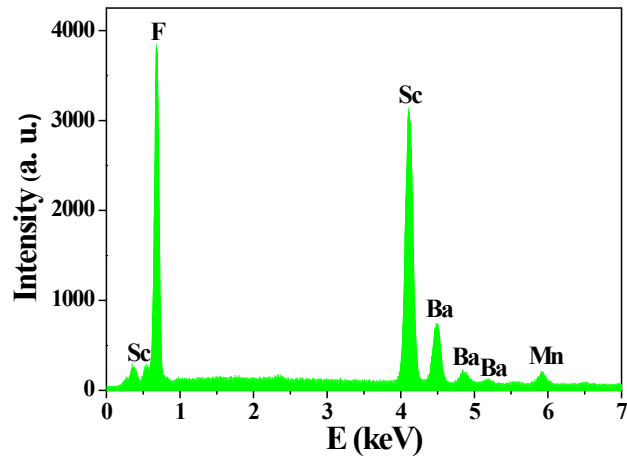

**Figure S1** Energy dispersive spectrum (EDS) of red phosphor  $\text{Ba}_3\text{Sc}_2\text{F}_{12}:\text{Mn}^{4+}$ .

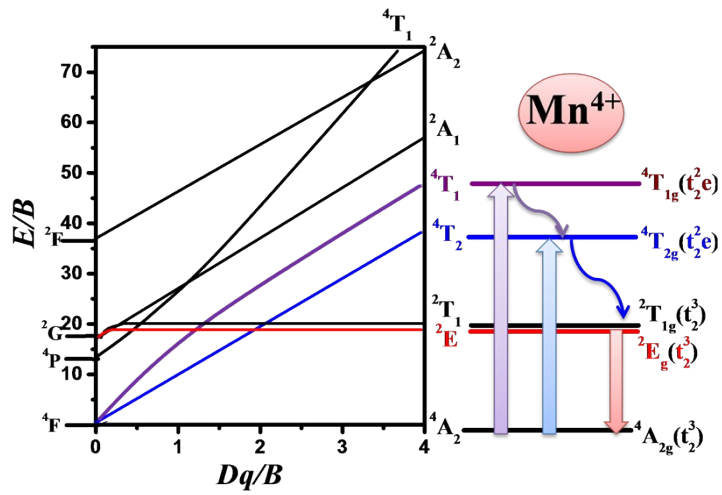

**Figure S2** Schematic energy level diagram for  $5d^3$  electron configuration of  $\text{Mn}^{4+}$  in the center of octahedron structure.

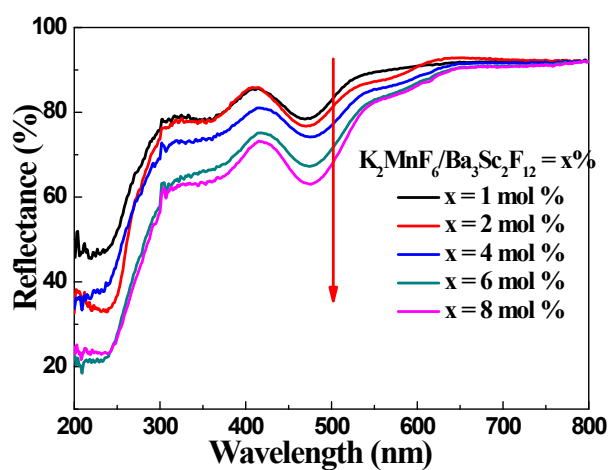

**Figure S3** The powder diffuse reflectance spectra of  $\text{Ba}_3\text{Sc}_2\text{F}_{12}:\text{Mn}^{4+}$  with various concentrations of  $\text{K}_2\text{MnF}_6$ .

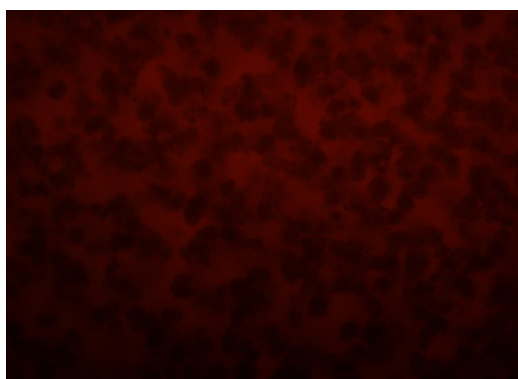

**Figure S4** The fluorescent microscopic image of  $\text{Ba}_3\text{Sc}_2\text{F}_{12}:\text{Mn}^{4+}$  taken by a Lecia DMI3000B inverted optical micro-scope.

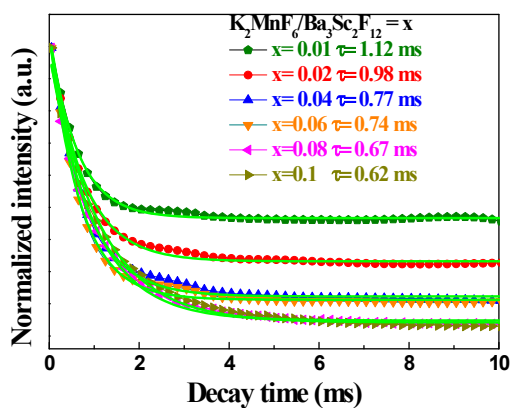

**Figure S5** Decay curves (detected at 629 nm with excitation at 467 nm) of

$\text{Ba}_3\text{Sc}_2\text{F}_{12}:\text{Mn}^{4+}$  samples with various concentrations of  $\text{K}_2\text{MnF}_6$ .

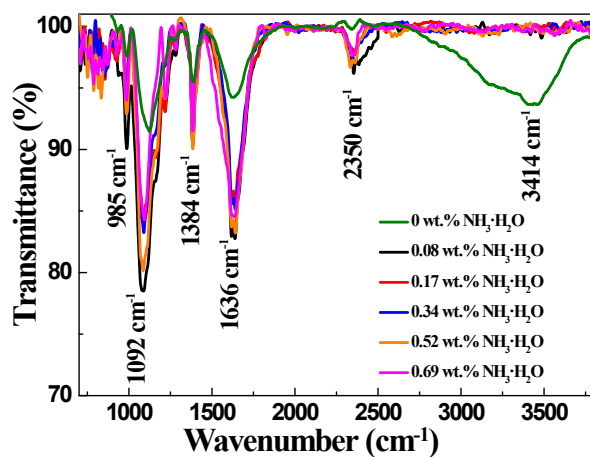

**Figure S6** FT-IR spectra of red phosphors  $\text{Ba}_3\text{Sc}_2\text{F}_{12}:\text{Mn}^{4+}$  synthesized with the concentrations of  $\text{NH}_3\cdot\text{H}_2\text{O}$  in reaction system.

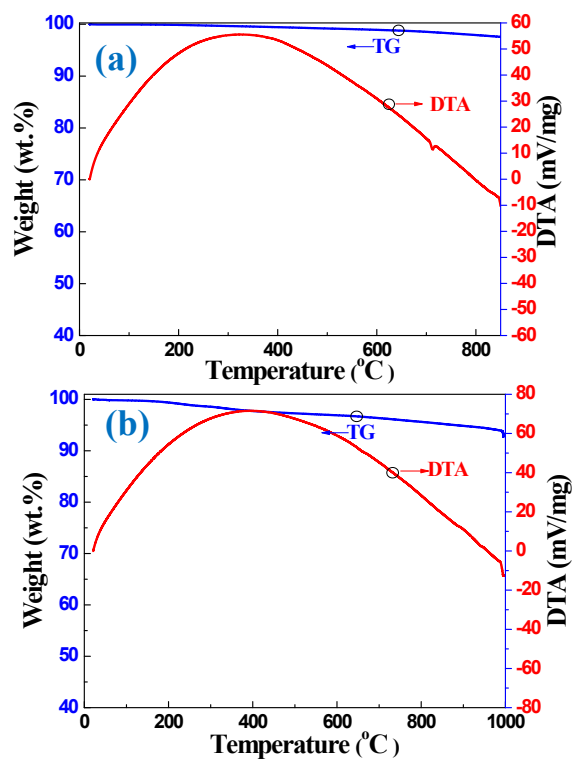

**Figure S7** (a) Thermogravimetrics (TG) and differential thermal analysis (DTA)

graphs of as synthesized red phosphors  $\text{Ba}_3\text{Sc}_2\text{F}_{12}:\text{Mn}^{4+}$  with concentrations of  $\text{K}_2\text{MnF}_6$  at (a) 1 mol% and (b) 6 mol% under  $\text{N}_2$  atmosphere;
